# Supplementary material for: Enhanced Frank elasticity and storage modulus in a diamagnetic liquid crystalline ferrogel
Source: Royal Society of Chemistry journal article supplement (doi:10.1039/c1sm05986f), 2011-01-01
Supplement: c1sm05986f.pdf [file c1sm05986f.pdf]

## Enhanced Frank Elasticity and Storage Modulus in a Diamagnetic Liquid Crystalline Ferrogel

R. Bhargavi<sup>1</sup>, Geetha G. Nair<sup>1\*</sup>, S. Krishna Prasad<sup>1\*</sup>, Nitesh Kumar<sup>2</sup> and A. Sundaresan<sup>2</sup>

<sup>1</sup>Centre for Soft Matter Research, Jalahalli, Bangalore 560013, India

<sup>2</sup>Chemistry and Physics of Materials Unit, Jawaharlal Nehru Centre for Advanced Scientific Research, Jakkur, Bangalore 560064, India.

[\*] Dr. S. Krishna Prasad, [skpras@gmail.com](mailto:skpras@gmail.com), Corresponding-Author  
Dr. Geetha G. Nair, [geeraj88@gmail.com](mailto:geeraj88@gmail.com), Corresponding Author-Two.

### Supplementary Information

PLC (commercially available as BLO36 through Merck Ltd., Poole, GB) used in the study consists of

1. 6.75% of 4-ethyl-4'-cyanobiphenyl
2. 18.76% of 4-pentoxy-4'-cyanobiphenyl
3. 8.75% of 4-hexoxy-4'-cyanobiphenyl
4. 10.01% of 4-(trans-4-pentylcyclohexyl)-4'-cyanobiphenyl
5. 4.97% of 4-pentyl-4''-cyanoterphenyl
6. 30.00% of 4-pentyl-4'-cyanobiphenyl
7. 18.76% of 4-(4-propylphenyl)-3-fluoro-4'-cyanobiphenyl

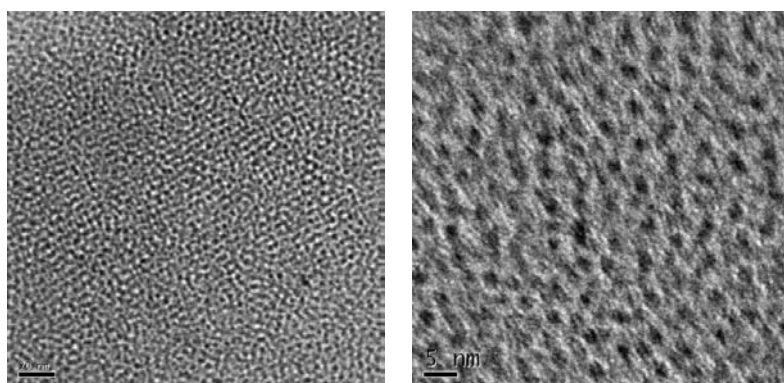

Figure SI-1: TEM images of the *as-prepared* FePt particles. The scale bar measures 20nm and 5 nm in the left and the right micrographs respectively.

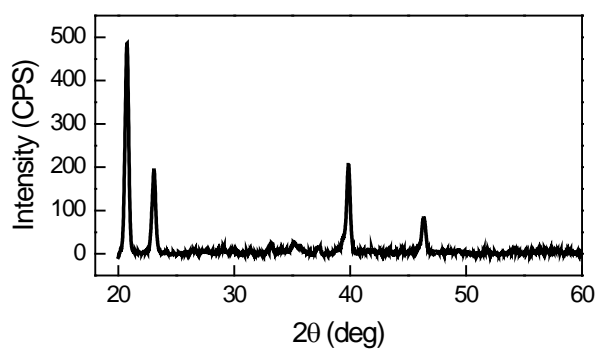

Figure SI-2: XRD data of annealed FePt nanoparticles obtained at 25 °C.

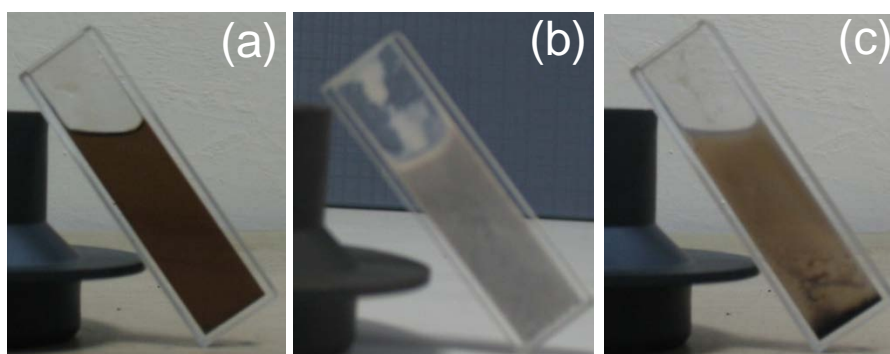

Figure SI-3: Photographs to show the uniform dispersion of FePt nanoparticles in the (a) isotropic (b) gel states of FG<sub>10</sub>. In contrast, (c) the particles show sedimentation when the material is held in the N phase for a few hours.

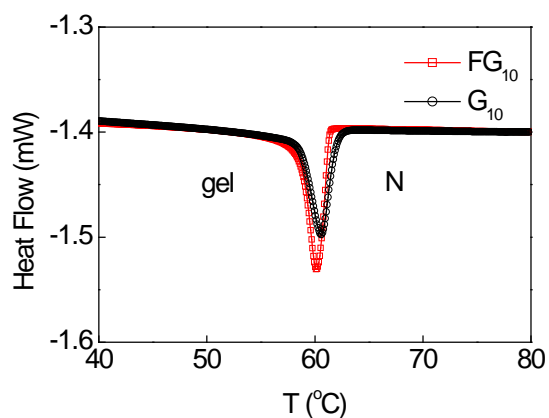

Figure SI-4: DSC profiles across N to gel transition in FG<sub>10</sub> and G<sub>10</sub>, the gels with and without FePt nanoparticles respectively.

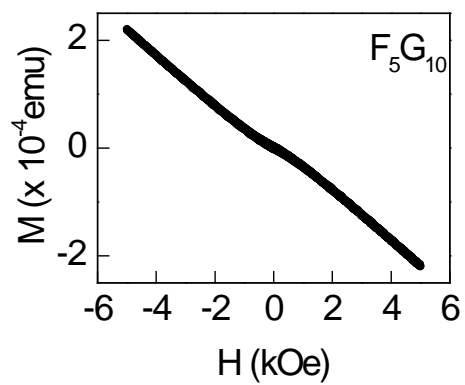

Figure SI-5: VSM measurements for  $F_5G_{10}$  gel containing 5% FePt nanoparticles.
